# Supplementary material for: Diversity of the Senescence Phenotype of Cancer Cells Treated with Chemotherapeutic Agents
Source: PubMed Central journal article supplement (PMC6952928; doi:10.3390/cells8121501), 2019-11-23
Supplement: cells-08-01501-s001.pdf [file cells-08-01501-s001.pdf]

Supplementary file

# Diversity of the Senescence Phenotype of Cancer Cells Treated with Chemotherapeutic Agents

Agnieszka Bojko <sup>1,†</sup>, Joanna Czarnecka-Herok <sup>1,†</sup>, Agata Charzynska <sup>2</sup>, Michal Dabrowski <sup>2</sup>, and Ewa Sikora <sup>1,\*</sup>

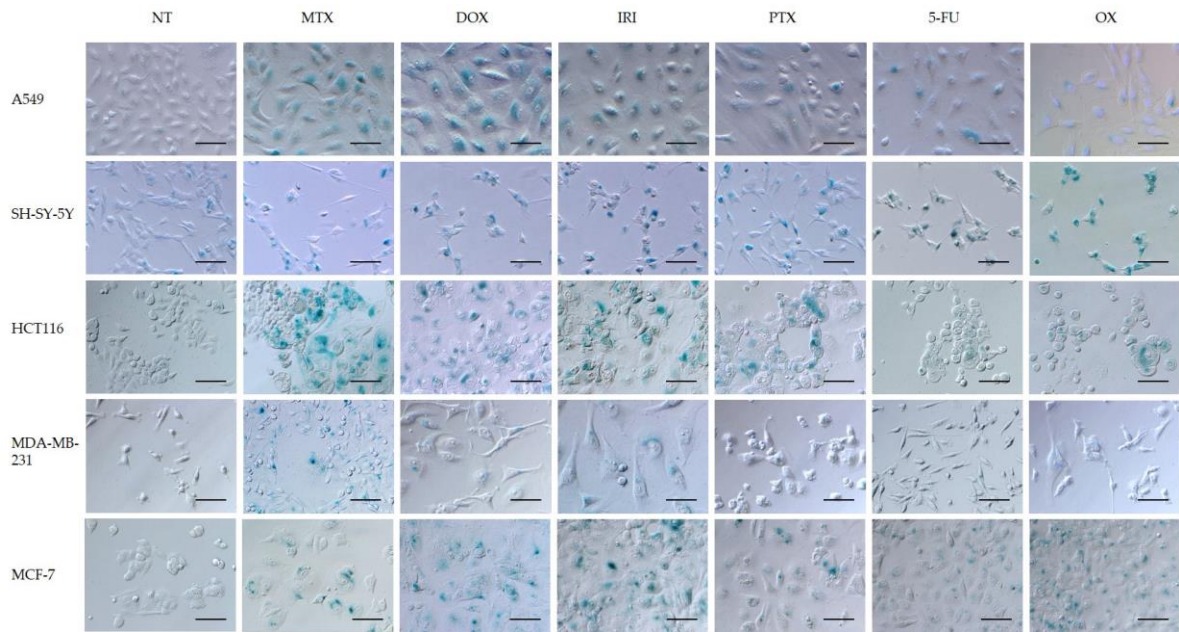

**Figure S1.** SA-β-galactosidase activity of treated cells at D1+3. Senescent cells are characterized by accumulation of SA-β-gal within cytoplasm (blue staining), as well as enlarged size and flattened morphology. Scale bar = 100 μm.

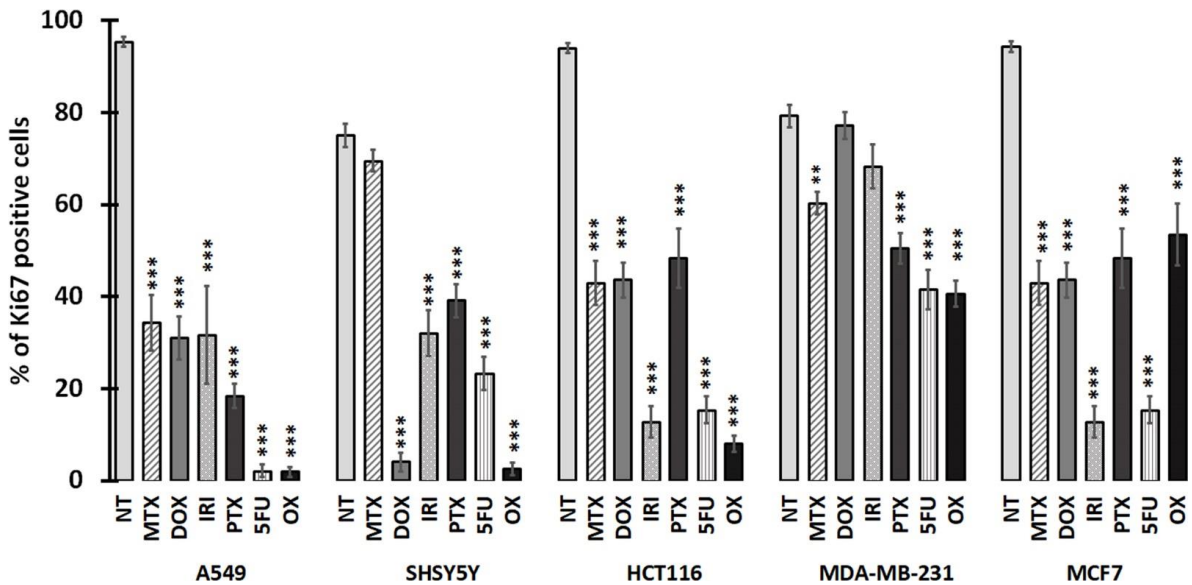

**Figure S2.** Percentage of Ki67-positive cells after treatment with tested drugs at D1+3. The bars represent mean values of at least three independent experiments ± SEM. Statistical significance (in relation to control): \* 0.01 < p < 0.05; \*\* 0.001 < p < 0.01 \*\*\* p < 0.001. NT: nontreated cells.
